# Supplementary material for: Prediction of Type 2 Diabetes by Hemoglobin A1c in Two Community-Based Cohorts
Source: Oxford University Press journal article supplement (doi:10.2337/dc17-0607), 2017-10-26
Supplement: dc170607supplementarydata.xlsx [file dc170607supplementarydata.xlsx]

## Sheet: Suppl Table 1 included excluded
	Table S1: Characteristics of non-diabetic participants included and excluded from the initial study sample
		FHS*					ARIC Whites*					ARIC Blacks*
		Study Sample		Participants with missing values		P	Study Sample		Participants with missing values		P	Study Sample		Participants with missing values		P
		N		N			N		N			N		N
	Age (years), mean(SD)	2243	54.4 (10.0)	1134	54.3 (9.8)	0.73	9001	57.0 (5.7)	286	57.2 (5.8)	0.65	2293	55.8 (5.8)	196	55.8 (6.0)	0.97
	Female (%)	2243	55.2	1134	51.7	0.053	9001	54.1	286	48.3	0.05	2293	63.2	196	51.5	0.001
	Body Mass Index (kgm-2), mean (SD)	2243	27.1 (4.7)	1108	27.1 (4.8)	0.83	9001	26.9 (4.6)	280	26.3 (4.7)	0.05	2293	29.2 (6.1)	184	27.7 (5.7)	<.001
	Systolic Blood Pressure (mmHg), mean (SD)	2243	124.7 (18.4)	1133	125.6 (18.3)	0.14	9001	118.6 (17.4)	285	119.0 (16.2)	0.73	2293	125.9 (20.7)	194	125.0 (21.5)	0.56
	High density Lipoprotein (mg/dL), mean, (SD)	2243	51.1 (15.2)	1096	50.0 (14.9)	0.065	9001	49.7 (16.6)	238	47.9 (16.6)	0.1	2293	55.0 (17.3)	143	55.7 (21.2)	0.67
	Fasting Triglycerides (mg/dL), mean (SD)	2243	139.3 (87.7)	1107	147.4 (125.7)	0.055	9001	133.7 (77.0)	266	139.2 (90.9)	0.26	2293	103.7 (66.5)	152	110.4 (55.1)	0.23
	Fasting Glucose (mg/dL), mean, SD)	2243	95.0 (9.5)	1105	94.6 (9.6)	0.36	9001	101.1 (9.2)	277	101.4 (10.9)	0.64	2293	102.8 (9.7)	164	102.2 (13.4)	0.47
	HbA1c (%-points), mean (SD)	2243	5.2 (0.5)	159	5.3 (0.5)	0.044	9001	5.4 (0.3)	159	5.4 (0.4)	0.68	2293	5.6 (0.4)	116	5.5 (0.5)	0.18
	Family history of diabetes (%)	2243	16.7	1134	14.2	0.063	9001	21.2	286	20.6	0.8	2293	23.4	196	22.5	0.77
	*Participants with HbA1c>= 6.5%, FG >= 126 mg/dL, sefl-reported physician diagnosis ,or use of DM medication, were excluded

## Sheet: Suppl Table 2 main betas
	Table S3: Association of HbA1c with incident T2D adjusted for other clinical predictors by cohort and race
	Model	Covariates	Cohort/race	Beta Cofficients for HbA1c (95% CI) and Model Equations	OR	P
	HbA1c-only	age, sex	FHS	1.317 (1.015, 1.618)	3.73 (2.76, 5.04)	<0.001
				log(OR)= -8.48-0.01(age)-0.37(sex)+1.32(HbA1c)
			ARIC Whites	1.749 (1.595, 1.903)	5.75 (4.93, 6.71)	<0.001
				ln(OR) = -7.59-0.05(age)-0.10(sex)+1.75(HbA1c)
			Meta-analysis of FHS and ARIC whites	1.55 (1.13, 1.98)	4.73 (3.10, 7.21)	<0.001
				I-squared 84%; heterogeneity P = 0.01
			ARIC Blacks	1.387 (1.145, 1.630)	4.00 (3.14, 5.10)	<0.001
				ln(OR) = -5.88-0.05(age)+0.06(sex)+1.39(HbA1c)
	HbA1c + fasting labs	age, sex, FG, TG, HDL	FHS	0.837 (0.514, 1.161)	2.31(1.67, 3.19)	<0.001
				log(OR)= -15.3-0.03(age)+0.47(sex)+0.84(HbA1c)-0.05(HDL)+0(TG)+0.12(FG)
			ARIC Whites	1.185 (1.022, 1.349)	3.27 (2.78, 3.85)	<0.001
				ln(OR) = -10.36-0.06(age)+0.31(sex)+0.06(FG)+0.003(TG)-0.01(HDL)+1.19(HbA1c)
			Meta-analysis of FHS and ARIC whites	1.04 (0.70, 1.38)	2.83 (2.02, 3.96)	<0.001
				I-squared 72%; heterogeneity P = 0.06
			ARIC Blacks	1.007 (0.756, 1.257)	2.74 (2.13, 3.52)	<0.001
				ln(OR) = -8.88-0.05(age)+0.16(sex)+0.05(FG)+0.003(TG)-0.004(HDL)+1.01(HbA1c)
	HbA1c + clinic visit	age, sex, FH, BMI, SBP	FHS	1.094 (0.784, 1.404)	2.99(2.19, 4.07)	<0.001
				log(OR)= -12.81-0.01(age)-0.27(sex)+1.09(HbA1c)+0.73(FH)+0.02(SBP)+0.12(BMI)
			ARIC Whites	1.571 (1.414, 1.729)	4.81 (4.11, 5.63)	<0.001
				ln(OR) = -9.97-0.05(age)-0.06(sex)+0.48(FH)+0.09(BMI)+0.01(SBP)+1.57(HbA1c)
			Meta-analysis of FHS and ARIC whites	1.35 (0.89, 1.82)	3.87 (2.43, 6.16)	<0.001
				I-squared 86%; heterogeneity P = 0.01
			ARIC Blacks	1.271 (1.027, 1.516)	3.56 (2.79, 4.55)	<0.001
				ln(OR) = -6.92-0.04(age)-0.10(sex)+0.23(FH)+0.05(BMI)+0(SBP)+1.27(HbA1c)
	HbA1c + fasting labs + clinic visit	age, sex, BMI, SBP, FH, FG, TG, HDL	FHS	0.754 (0.422, 1.086)	2.13 (1.53, 2.96)	<0.001
				log(OR)= -17.34-0.03(age)+0.41(sex)+0.75(HbA1c)+0.76(FH)+0.01(SBP)+0.06(BMI)-0.05(HDL)+0.00(TG)
			ARIC Whites	1.146 (0.981, 1.311)	3.15 (2.67, 3.71)	<0.001
				ln(OR) = -11.74-0.06(age)+0.25(sex)+0.06(BMI)+0.01(SBP)+0.43(FH)+0.05(FG)+0.003(TG)-0.01(HDL)+1.15(HbA1c)
			Meta-analysis of FHS and ARIC whites	0.98 (0.60, 1.36)	2.66 (1.82, 3.89)	<0.001
				I-squared 77%; heterogeneity P = 0.04
			ARIC Blacks	0.952 (0.700, 1.205)	2.59 (2.01, 3.34)	<0.001
				ln(OR) = -9.61-0.04(age)+0.01(sex)+0.04(BMI)+0(SBP)+0.19(FH)+0.05(FG)+0.003(TG)-0.002(HDL)+0.95(HbA1c)
	Meta-analysis using random effects; HbA1c: hemoglobin A1c (%-units); T2D: type 2 diabetes; FG: fasting glucose (mg/dL); sex (female=1; male=0); TG: triglycerides (mg/dL); HDL: high density lipoprotein (mg/dL); FH: family history of type 2 diabetes (yes=1; no=0); BMI: body mass index (kgm-2); SBP: systolic blood pressure (mmHg); 95% CI: 95% confidence interval; FHS: Framingham Heart Study; ARIC: A…

## Sheet: Suppl Table 3 pooled analysis
	Table S4: Association of HbA1c with incident T2D adjusted for other clinical predictors in a pooled analysis
	Model	Covariates	Cohort/race	AUC without HbA1c (95%CI)	AUC with HbA1c (95%CI)	Difference in AUC (95%CI)	P	Beta Cofficients for HbA1c (95% CI) and Model Equations	OR	P
	HbA1c-only	age, sex, race, cohort	Whites, pooled	0.59	0.69	0.092	<0.001	1.64 (1.50, 1.79)	5.17	<0.001
				(0.58, 0.60)	(0.68, 0.70)	(0.080, 0.104)		log(OR)= -8.66-0.04(age)-0.13(sex)+1.64(HbA1c)+0.88(Cohort)	(4.48, 5.97)
			Blacks	0.59	0.68	0.092	<.0001	1.39 (1.13, 1.64)	4	<0.001
				(0.58, 0.60)	(0.67, 0.70)	(0.080, 0.104)		log(OR)= -5.88-0.05(age)+0.06(sex)+1.39(HbA1c)	(3.10, 5.17)
			Whites and blacks, pooled	0.6	0.69	0.082	<0.001	1.59 (1.46, 1.71)	4.89	<0.001
				(0.59, 0.61)	(0.68, 0.70)	(0.071, 0.093)		log(OR)= -8.28-0.04(age)-0.09(sex)+1.59(HbA1c)+0.88(Cohort)-0.01(race)	(4.31, 5.54)
	HbA1c + fasting labs	age, sex, race, cohort, FG, TG, HDL	Whites, pooled	0.73	0.75	0.019	<0.001	1.09 (0.94, 1.23)	2.97	<0.001
				(0.72, 0.74)	(0.74, 0.76)	(0.014, 0.023)		log(OR)= -11.77-0.05(age)+0.34(sex)+1.09(HbA1c)+0.62(Cohort)+0.07(FG)-0.01(HDL)+0(TG)	(2.56, 3.44)
			Blacks	0.73	0.75	0.019	<.0001	1.01 (0.75, 1.27)	2.74	<0.001
				(0.72, 0.74)	(0.74, 0.76)	(0.014, 0.023)		log(OR)= -8.88-0.05(age)+0.16(sex)+1.01(HbA1c)+0.05(FG)-0.00(HDL)+0.00(TG)	(2.11, 3.55)
			Whites and blacks, pooled	0.73	0.75	0.0159	<0.001	1.07 (0.94, 1.20)	2.92	<0.001
				(0.72, 0.74)	(0.74, 0.76)	(0.011, 0.020)		log(OR)= -11.37-0.05(age)+0.28(sex)+1.07(HbA1c)+0.64(Cohort)+0.14(race)+0.06(FG)-0.01(HDL)+0(TG)	(2.57, 3.31)
	HbA1c + clinic visit	age, sex, race, cohort, FH, BMI, SBP	Whites, pooled	0.69	0.73	0.038	<0.001	1.46 (1.32, 1.61)	4.31	<0.001
				(0.68, 0.70)	(0.72, 0.74)	(0.031, 0.046)		log(OR)= -11.39-0.04(age)-0.08(sex)+1.46(HbA1c)+1.01(Cohort)+0.01(SBP)+0.09(BMI)+0.50(FH)	(3.73, 4.98)
			Blacks	0.69	0.73	0.038	<.0001	1.27 (1.01, 1.53)	3.56	<0.001
				(0.68, 0.70)	(0.72, 0.73)	(0.031, 0.046)		log(OR)= -6.92-0.04(age)-0.10(sex)+1.27(HbA1c)+0(SBP)+0.05(BMI)+0.23(FH)	(2.76, 4.61)
			Whites and blacks, pooled	0.69	0.73	0.037	<0.001	1.42 (1.29, 1.55)	4.14	<0.001
				(0.68, 0.70)	(0.72, 0.74)	(0.030, 0.045)		log(OR)= -10.56-0.04(age)-0.11(sex)+1.42(HbA1c)+0.99(Cohort)-0.21(race)+0.01(SBP)+0.08(BMI)+0.45(FH)	(3.66, 4.70)
	HbA1c + fasting labs + clinic visit	age, sex, race, cohort, BMI, SBP, FH, FG, TG, HDL	Whites, pooled	0.75	0.76	0.013	<0.001	1.04 (0.89, 1.19)	2.83	<0.001
				(0.74, 0.76)	(0.75, 0.77)	(0.010, 0.017)		log(OR)= -13.32-0.05(age)+0.28(sex)+1.04(HbA1c)+0.74(Cohort)+0.06(FG)-0.01(HDL)+0(TG)+0.01(SBP)+0.06(BMI)+0.46(FH)	(2.44, 3.28)
			Blacks	0.75	0.76	0.013	<.0001	0.95 (0.69, 1.21)	2.59	<0.001
				(0.74, 0.76)	(0.75, 0.77)	(0.0096, 0.017)		log(OR)= -9.61-0.04(age)+0.01(sex)+0.95(HbA1c)+0.05(FG)-0.002(HDL)+0.003(TG)-0(SBP)+0.04(BMI)+0.19(FH)	(2.00, 3.36)
			Whites and blacks, pooled	0.751	0.763	0.012	<0.001	1.02 (0.89, 1.15)	2.78	<0.001
				(0.74, 0.76)	(0.75, 0.77)	(0.009, 0.016)		log(OR)= -12.71-0.05(age)+0.19(sex)+1.02(HbA1c)+0.73(Cohort)-0.02(race)+0.06(FG)-0.01(HDL)+0(TG)+0(SBP)+0.05(BMI)+0.41(FH)	(2.44, 3.16)
	HbA1c: hemoglobin A1c (%-units); T2D: type 2 diabetes; FG: fasting glucose (mg/dL); sex (female=1; male=0); cohort (ARIC=1; FHS=0); race (black=1; white=0); TG: triglycerides (mg/dL); HDL: high density lipoprotein (mg/dL); FH: family history of type 2 diabetes (yes=1; no=0); BMI: body mass index (kgm-2); SBP: systolic blood pressure (mmHg); 95% CI: 95% confidence interval; FHS: Framingham Heart S…

## Sheet: Suppl Table 4 A1C binary
	Table S5: Association of HbA1c with incident T2D and improvement in predictive performance over other clinical predictors by cohort, race and by IFG status
	Model	Covariates	Cohort /race	AUC without HbA1c (95%CI)	AUC with HbA1c (95%CI)	Difference in AUC (95%CI)	P	Beta Cofficients for HbA1c (95% CI) and Model Equations	OR	P
	All Participants
	HbA1c-only	age, sex	FHS	0.56 (0.53-0.59)	0.64 (0.60, 0.67)	0.075 (0.046, 0.104)	<0.001	1.15 (0.86, 1.43)	3.15 (2.36, 4.20)	<0.001
								log(OR)= -2.23+0(age) -0.33(sex)+1.15(HbA1c)
			ARIC Whites	0.55 (0.53, 0.56)	0.64 (0.63, 0.65)	0.093 (0.093, 0.093)	<0.001	1.22 (1.11, 1.33)	3.38 (3.02, 3.77)	<0.001
								log(OR)= -1.25-0.05(age)-0.11(sex)+1.22(HbA1c)
			ARIC Blacks	0.55 (0.53, 0.58	0.64 (0.61, 0.66)	0.084 (0.083, 0.084)	<0.001	0.89 (0.71, 1.07)	2.43 (2.03, 2.91)	<0.001
								log(OR)= 1.16-0.04(age)+0.08(sex)+0.89(HbA1c)
	HbA1c + fasting labs	age, sex, FG, TG, HDL	FHS	0.85 (0.82, 0.87)	0.85 (0.83, 0.88)	0.006 (-0.000, 0.012)	0.066	0.77 (0.44, 1.09)	2.15 (1.55, 2.98)	<0.001
								log(OR)= -11.59-0.03(age)+0.51(sex)+ 0.76(HbA1c) -0.05(HDL)+ 0(TG)+0.13(FG)
			ARIC Whites	0.71 (0.70, 0.72)	0.72 (0.71, 0.74)	0.015 (0.014, 0.015)	<0.001	0.84 (0.73, 0.96)	2.33 (2.07, 2.62)	<0.001
								log(OR)= -4.61-0.05(age)+0.33(sex)+0.06(FG)+0.003(TG)-0.01(HDL)+0.84(HbA1c)
			ARIC Blacks	0.68 (0.66, 0.70)	0.70 (0.68, 0.72)	0.021 (0.02, 0.021)	0.0001	0.64 (0.45, 0.83)	1.90 (1.57, 2.30)	<0.001
								log(OR)= -4.06-0.05(age)+0.19(sex)+0.05(FG)+0.003(TG)-0.004(HDL)+0.64(HbA1c)
	HbA1c + clinic visit	age, sex, FH, BMI, SBP	FHS	0.75 (0.72, 0.78)	0.76 (0.74, 0.79)	0.016 (0.002, 0.03)	0.025	0.95 (0.64, 1.25)	2.57 (1.89, 3.50)	<0.001
								log(OR)=-7.78-0.01(age)-0.22(sex)+ 0.95(HbA1c)+ 0.76(FH)+0.02(SBP)+ 0.12(BMI)
			ARIC Whites	0.67 (0.65, 0.68)	0.70 (0.69, 0.71)	0.036 (0.036, 0.036)	<0.001	1.09 (0.98, 1.21)	2.99 (2.66, 3.35)	<0.001
								log(OR)= -2.11-0.05(age)-0.06(sex)+0.49(FH)+0.09(BMI)+0.01(SBP)+1.09(HbA1c)
			ARIC Blacks	0.62 (0.60, 0.65)	0.67 (0.64, 0.69)	0.043 (0.042, 0.043)	<0.001	0.82 (0.63, 1.00)	2.26 (1.88, 2.72)	<0.001
								log(OR)= -0.51-0.04(age)-0.09(sex)+0.22(FH)+0.05(BMI)+0(SBP)+0.82(HbA1c)
	HbA1c + fasting labs + clinic visit	age, sex, BMI, SBP, FH, FG, TG, HDL	FHS	0.86 (0.83, 0.88)	0.86 (0.84, 0.89)	0.005 (-0.000, 0.01)	0.074	0.69 (0.35, 1.03)	1.99 (1.41, 2.80)	<0.001
								log(OR)= -14.06 -0.03(age)+ 0.45(sex)+0.69(HbA1c)+0.77(FH)+0.01(SBP)+ 0.06(BMI) -0.05(HDL)+ 0(TG)
			ARIC Whites	0.73 (0.72, 0.74)	0.74 (0.73, 0.75)	0.012 (0.012, 0.012)	<0.001	0.81 (0.69, 0.93)	2.26 (2.00, 2.55)	<0.001
								log(OR)= -6.18-0.05(age)+0.27(sex)+0.06(BMI)+0(SBP)+0.44(FH)+0.06(FG)+0.003(TG)-0.008(HDL)+0.81(HbA1c)
			ARIC Blacks	0.70 (0.67, 0.72)	0.71 (0.69, 0.73)	0.015 (0.014, 0.015)	0.013	0.60 (0.40, 0.79)	1.82 (1.50, 2.21)	<0.001
								log(OR)= -5.09-0.04(age)+0.03(sex)+0.04(BMI)+0(SBP)+0.19(FH)+0.05(FG)+0.003(TG)-0.002(HDL)+0.60(HbA1c)
	FG<100 mg/dL (No IFG)
	HbA1c-only	age, sex	FHS	0.57 (0.50, 0.63)	0.60 (0.53, 0.66)	0.0291 (-0.017,0.075)	0.219	0.81 (0.29, 1.33)	2.24 (1.33, 3.77)	0.002
								log(OR)= -1.62-0.02(age) -0.37(sex)+ 0.81(HbA1c)
			ARIC Whites	0.54 (0.52, 0.56)	0.58 (0.56, 0.60)	0.041 (0.040, 0.041)	0.0001	0.88 (0.65, 1.10)	2.40 (1.92, 3.02)	<0.001
								log(OR)= 0.10-0.03(age)+0(sex)+0.88(HbA1c)
			ARIC Blacks	0.56 (0.52, 0.61)	0.59 (0.54, 0.64)	0.028 (0.027, 0.029)	0.1441	0.50 (0.16, 0.83)	1.64 (1.17, 2.30)	0.004
								log(OR)= 0.43-0.04(age)+0.24(sex)+0.50(HbA1c)
	HbA1c + fasting labs	age, sex, TG, HDL, FG	FHS	0.79 (0.73, 0.84)	0.79 (0.74, 0.85)	0.008 (-0.004, 0.02)	0.462	0.62(0.08-1.16)	1.86 (1.08, 3.20)	0.025
								log(OR)= -8.93 -0.03(age)+0.54(sex)+0.62(HbA1c) -0.06(HDL)+ 0(TG)+ 0.1(FG)
			ARIC Whites	0.61 (0.59, 0.63)	0.63 (0.61, 0.65)	0.021 (0.021, 0.021)	0.0044	0.79 (0.56, 1.02)	2.21 (1.75, 2.79)	<0.001
								log(OR)= -2.36-0.04(age)+0.22(sex)+0.03(FG)+0(TG)-0.01(HDL)+0.79(HbA1c)
			ARIC Blacks	0.59 (0.54, 0.63)	0.61 (0.56, 0.65)	0.017 (0.017, 0..018)	0.1797	0.45 (0.11, 0.80)	1.57 (1.12, 2.21)	0.009
								log(OR)= -0.43-0.04(age)+0.37(sex)+0.01(FG)+0(TG)-0.01(HDL)+0.45(HbA1c)
	HbA1c + clinic visit	age, sex, FH, BMI, SBP		0.70 (0.65, 0.76)	0.72 (0.66, 0.77)	0.014 (-0.007, 0.036)	0.19	0.66 (0.10, 1.21)	1.93 (1.11, 3.35)	0.018
			FHS					log(OR)=-6.17-0.03(age)-0.14(sex)+0.66(HbA1c)+ 0.23(FH)+ 0.02(SBP)+ 0.09(BMI)
				0.64 (0.61, 0.66)	0.65 (0.63, 0.68)	0.015 (0.015, 0.015)	0.0156	0.82 (0.59, 1.05)	2.27 (1.80, 2.87)	<0.001
			ARIC Whites					log(OR)= -2.87-0.04(age)+0.10(sex)+0.49(FH)+0.08(BMI)+0.01(SBP)+0.82(HbA1c)
				0.63 (0.59, 0.68)	0.64 (0.60, 0.69)	0.010 (0.009, 0.010)	0.2997	0.41 (0.06, 0.75)	1.50 (1.07, 2.12)	0.02
			ARIC Blacks					log(OR)= -1.72-0.03(age)-0.02(sex)+0.28(FH)+0.07(BMI)+0(SBP)+0.41(HbA1c)
	HbA1c + fasting labs + clinic visit	age, sex, BMI, SBP, FH, FG, TG, HDL	FHS	0.79 (0.74, 0.85)	0.80 (0.75, 0.85)	0.0076 (-0.002, 0.018)	0.139	0.57 (0.008, 1.12)	1.76 (1.01, 3.08)	0.046
								log(OR)= -10.77 -0.04(age)+ 0.59(sex)+0.57(HbA1c)+ 0.21(FH)+ 0.02(SBP)+0.04(BMI) -0.06(HDL)+ 0(TG)
			ARIC Whites	0.65 (0.63, 0.68)	0.67 (0.64, 0.69)	0.012 (0.012, 0.013)	0.0262	0.77 (0.54, 1.01)	2.16 (1.71, 2.74)	<0.001
								log(OR)= -4.19-0.04(age)+0.21(sex)+0.07(BMI)+0.01(SBP)+0.46(FH)+0.02(FG)+0(TG)+0(HDL)+0.77(HbA1c)
			ARIC Blacks	0.64 (0.60, 0.69)	0.65 (0.60, 0.69)	0.007 (0.007, 0.007)	0.395	0.39 (0.04,0.74)	1.48 (1.05, 2.09)	0.027
								log(OR)= -1.78-0.03(age)+0.09(sex)+0.07(BMI)+0(SBP)+0.27(FH)+0(FG)+0(TG)-0.01(HDL)+0.39(HbA1c)
	FG>=100 mg/dL (IFG)
	HbA1c-only	age, sex	FHS	0.52 (0.47, 0.57)	0.61 (0.56, 0.66)	0.088 (0.034, 0.142)	0.001	0.97 (0.59, 1.36)	2.65 (1.80, 3.90)	<0.001
								log(OR)=-0.64-0.01(age)+0.09(sex)+ 0.97(HbA1c)
			ARIC Whites	0.57 (0.55, 0.58)	0.65 (0.64, 0.67)	0.087 (0.087, 0.088)	<0.001	1.11 (0.98, 1.24)	3.03 (2.66, 3.47)	<0.001
								log(OR)= 2.33-0.06(age)+0.06(sex)+1.11(HbA1c)
			ARIC Blacks	0.55 (0.52, 0.58)	0.62 (0.59, 0.65)	0.068 (0.067, 0.069)	<0.001	0.86 (0.63, 1.08)	2.35 (1.87, 2.96)	<0.001
								log(OR)= 1.70-0.05(age)+0.09(sex)+0.86(HbA1c)
	HbA1c + fasting labs	age, sex, TG, HDL, FG	FHS	0.81 (0.78, 0.85)	0.82 (0.78, 0.85)	0.008 (-0.003, 0.020)	0.158	0.83 (0.41, 1.26)	2.30 (1.50, 3.51)	<0.001
								log(OR)=-12.52 -0.02(age)+ 0.47(sex)+ 0.83(HbA1c) -0.04(HDL)+ 0(TG)+ 0.13(FG)
			ARIC Whites	0.69 (0.67, 0.70)	0.71 (0.69, 0.73)	0.022 (0.022, 0.023)	0.0001	0.85 (0.71, 0.99)	2.34 (2.03, 2.69)	<0.001
								log(OR)= -5.51-0.06(age)+0.39(sex)+0.08(FG)+0(TG)-0.01(HDL)+0.85(HbA1c)
			ARIC Blacks	0.62 (0.59, 0.65)	0.65 (0.63, 0.68)	0.030 (0.029, 0.030)	0.0003	0.75 (0.51, 0.98)	2.11 (1.67, 2.67)	<0.001
								log(OR)= -5.27-0.05(age)+0.12(sex)+0.06(FG)+0(TG)+0(HDL)+0.75(HbA1c)
	HbA1c + clinic visit	age, sex, FH, BMI, SBP	FHS	0.73 (0.69, 0.77)	0.74 (0.70, 0.79)	0.012 (-0.007, 0.032)	0.217	0.82 (0.40, 1.24)	2.27 (1.49, 3.45)	<0.001
								log(OR)= -6.11-0.01(age)-0.04(sex)+0.82(HbA1c)+ 1.38(FH)+0.01(SBP)+0.12(BMI)
			ARIC Whites	0.65 (0.64, 0.67)	0.69 (0.68, 0.71)	0.041 (0.040, 0.042)	<0.001	1.03 (0.89, 1.17)	2.80 (2.44, 3.21)	<0.001
								log(OR)= -0.69-0.06(age)+0.02(sex)+0.47(FH)+0.08(BMI)+0.01(SBP)+1.03(HbA1c)
			ARIC Blacks	0.60 (0.57, 0.63)	0.63 (0.60, 0.66)	0.036 (0.035, 0.037)	<0.001	0.81 (0.58, 1.04)	2.25 (1.79, 2.83)	<0.001
								log(OR)= 0.50-0.04(age)-0.02(sex)+0.19(FH)+0.03(BMI)+0(SBP)+0.81(HbA1c)
	HbA1c + fasting labs + clinic visit	age, sex, BMI, SBP, FH, FG, TG, HDL	FHS	0.76 (0.73, 0.80)	0.78 (0.74, 0.82)	0.015 (-0.002, 0.032)	0.075	0.74 (0.28, 1.19)	2.09 (1.32, 3.30)	0.001
								log(OR)= -15.18 -0.02(age)+ 0.32(sex)+ 0.74(HbA1c)+ 1.32(FH)+0.01(SBP)+0.08(BMI)-0.04(HDL)+ 0(TG)
			ARIC Whites	0.70 (0.68, 0.71)	0.72 (0.71, 0.74)	0.023 (0.023, 0.024)	<0.001	0.82 (0.68, 0.96)	2.27 (1.97, 2.62)	<0.001
								log(OR)= -6.96-0.06(age)+0.30(sex)+0.05(BMI)+0(SBP)+0.43(FH)+0.07(FG)+0(TG)-0.01(HDL)+0.82(HbA1c)
			ARIC Blacks	0.63 (0.60, 0.66)	0.65 (0.62, 0.68)	0.024 (0.023, 0.024)	<0.001	0.72 (0.48, 0.95)	2.05 (1.61, 2.59)	<0.001
								log(OR)= -6.18-0.05(age)+0(sex)+0.03(BMI)+0(SBP)+0.16(FH)+0.06(FG)+0(TG)+0(HDL)+0.72(HbA1c)
	HbA1c: hemoglobin A1c (%-units); T2D: type 2 diabetes; FG: fasting glucose (mg/dL); sex (female=1; male=0); TG: triglycerides (mg/dL); HDL: high density lipoprotein (mg/dL); FH: family history of type 2 diabetes (yes=1; no=0); BMI: body mass index (kgm-2); SBP: systolic blood pressure (mmHg); 95% CI: 95% confidence interval; FHS: Framingham Heart Study; ARIC: Atherosclerosis risk in Communities; …

## Sheet: Suppl Table 5 exclude FG
	Table S6: Association of HbA1c with incident T2D adjusted for other clinical predictors by cohort and race in scenarios without fasting lab measurements
	Models	Covariates	HbA1c	Outcome	Cohort/ Race	Beta Cofficients for HbA1c (95% CI) and Model Equations	OR	P
	HbA1c-only	age, sex	Continuous	T2D over 20 years	FHS	1.53 (1.19, 1.88)	4.63 (3.28, 6.54)	<0.001
						log(OR)=-10.07-0.01(age) -0.31(sex)+ 1.53(HbA1c);
					ARIC Whites	1.94 (1.79, 2.09)	6.95 (5.98, 8.07)	<0.001
						log(OR)= -8.87-0.05(age) -0.03(sex)+ 1.94(HbA1c)
					ARIC Blacks	1.52 (1.28, 1.75)	4.55 (3.60, 5.76)	<0.001
						log(OR)= -6.89-0.04(age)+0.03(sex)+ 1.52(HbA1c)
	HbA1c + clinic visit	age, sex, FH, BMI, SBP	Continuous	T2D over 20 years	FHS	1.29 (0.93, 1.65)	3.63 (2.53, 5.21)	<0.001
						log(OR)=-13.59-0.01(age) -0.26(sex)+ 1.29(HbA1c)+0.84(FH)+ 0.01(SBP)+0.12(BMI);
					ARIC Whites	1.72 (1.57, 1.87)	5.59 (4.80, 6.52)	<0.001
						log(OR)=-11.16-0.05(age)-0.00(sex)+1.72(HbA1c)+ 0.50(FH)+ 0.01(SBP)+ 0.09(BMI)
					ARIC Blacks	1.39 (1.16, 1.63)	4.03 (3.18, 5.12)	<0.001
						log(OR)=-7.90-0.04(age)-0.12(sex)+1.39(HbA1c)+ 0.25(FH)+ 0.00(SBP)+ 0.04(BMI)
	HbA1c-only	age, sex	Continuous	Early T2D (<8 years)	FHS	1.72 (1.02, 2.42)	5.58 (2.77-11.25)	<0.001
						log(Pr(early DM/Pr(no DM)) =-15.25 +0.03(age) + 0.37(sex)+1.729HbA1c)
				late T2D (>= 8 years)		1.64 (1.20, 2.09)	5.16 (3.32-8.08)	<0.001
						log(Pr(late DM/Pr(no DM)) =-10.90 -0.02(age) + 0.33(sex)+1.64(HbA1c)
				Early T2D (<8 years)	ARIC Whites	3.54 (3.22, 3.86)	34.47 (25.09, 47.36)	<0.001
						log(Pr(early DM/Pr(no DM)) =-18.86 - 0.06(age) - 0.18(sex) + 3.54(HbA1c)
				late T2D (>= 8 years)		1.64 (1.48, 1.80)	5.15 (4.40, 6.04)	<0.001
						log(Pr(late DM/Pr(no DM)) =-7.56 - 0.05(age) - 0.002(sex) + 1.64(HbA1c)
				Early T2D (<8 years)	ARIC Blacks	3.06 (2.43, 3.68)	21.25 (11.42, 39.57)	<0.001
						log(Pr(early DM/Pr(no DM)) =-18.74 - 0.03(age) + 0.16(sex) + 3.06(HbA1c)
				late T2D (>= 8 years)		1.32 (1.08, 1.56)	3.75 (2.94, 4.78)	<0.001
						log(Pr(late DM/Pr(no DM)) =-5.78 - 0.05(age) + 0.02(sex) + 1.32(HbA1c)
	HbA1c + clinic visit	age, sex, FH, BMI, SBP	Continuous	Early T2D (<8 years)	FHS	1.46 (0.73, 2.19)	4.31 (2.08, 8.94)	<0.001
						log(Pr(early DM)/Pr(no DM)) =-20.94+0.0(age)+0.39(sex)+0.90(FH) +0.15(BMI)+0.01(SBP)+1.46(HbA1c)
				late T2D (>= 8 years)		1.43 (0.96, 1.90)	4.18 (2.61, 6.69)	<0.001
						log(Pr(late DM)/Pr(no DM)) =-15.00-0.02(age)+0.25(sex)+0.95(FH) +0.13(BMI)+0.009(SBP)+1.43(HbA1c)
				Early T2D (<8 years)	ARIC Whites	3.22 (2.89, 3.55)	25.02 (18.07, 34.64)	<0.001
						log(Pr(early DM)/Pr(no DM)) =-22.21 - 0.05(age) - 0.23(sex) + 0.61(FH) + 0.14(BMI) + 0.004(SBP) + 3.22(HbA1c)
				late T2D (>= 8 years)		1.46 (1.30, 1.62)	4.31 (3.67, 5.06)	<0.001
						log(Pr(late DM)/Pr(no DM)) =-9.76 - 0.05(age) + 0.03(sex) + 0.48(FH) + 0.08(BMI) + 0.008(SBP) + 1.46(HbA1c)
				Early T2D (<8 years)	ARIC Blacks	2.85 (2.22, 3.48)	17.31 (9.23, 32.47)	<0.001
						log(Pr(early DM)/Pr(no DM)) =-20.72 - 0.03(age) - 0.05(sex) + 0.53(FH) + 0.06(BMI) + 0.012(SBP) + 2.85(HbA1c)
				late T2D (>= 8 years)		1.22 (0.97, 1.46)	3.37 (2.64, 4.31)	<0.001
						log(Pr(late DM)/Pr(no DM)) =-6.64 - 0.04(age) - 0.12(sex) + 0.21(FH) + 0.04(BMI) + 0.00(SBP) + 1.22(HbA1c)
	HbA1c-only	age, sex	Binary (>=5.7 % vs. <5.7)	T2D over 20 years	FHS	1.21 (0.88, 1.54)	3.35 (2.41, 4.65)	<0.001
						log(OR)= -2.71+0(age) -0.27(sex)+ 1.21(HbA1c);
					ARIC Whites	1.32 (1.21, 1.43)	3.74 (3.36, 4.16)	<0.001
						log(OR)= 0.91-0.04(age) -0.04(sex)+ 1.32(HbA1c)
					ARIC Blacks	1.00 (0.82, 1.18)	2.72 (2.27, 3.25)	<0.001
						log(OR)= 0.87-0.04(age)+0.05(sex)+1.00(HbA1c)
	HbA1c + clinic visit	age, sex, FH, BMI, SBP	Binary (>=5.7 % vs. <5.7)	T2D over 20 years	FHS	1.01 (0.66, 1.36)	2.74 (1.93, 3.89)	<0.001
						log(OR)= -7.7+ 0(age)-0.21(sex)+ 1.01(HbA1c)+0.87(FH)+0.01(SBP)+ 0.12(BMI);
					ARIC Whites	1.17 (1.06, 1.28)	3.23 (2.89, 3.61)	<0.001
						log(OR)=-2.58-0.04(age)-0.00(sex)+1.17(HbA1c)+ 0.52(FH)+ 0.01(SBP)+ 0.09(BMI)
					ARIC Blacks	0.91 (0.73, 1.09)	2.48 (2.07, 2.98)	<0.001
						log(OR)=-0.88-0.04(age)-0.11(sex)+0.91(HbA1c)+ 0.26(FH)+ 0.00(SBP)+ 0.05(BMI)
	HbA1c-only	age, sex	Binary (>=5.7 % vs. <5.7)	Early T2D (<8 years)	FHS	1.29 (0.64, 1.93)	3.63 (1.90, 6.89)	<0.001
						log(Pr(early DM/Pr(no DM)) =-6.85 +0.04(age) + 0.30(sex)+1.29(HbA1c)
				late T2D (>= 8 years)		1.30 (0.89, 1.71)	3.67 (2.44, 5.53)	<0.001
						log(Pr(late DM/Pr(no DM)) =-2.94 -0.009(age)+ 0.28 (sex)+ 1.30(HbA1c)
				Early T2D (<8 years)	ARIC Whites	2.24 (2.02, 2.46)	9.41 (7.53, 11.75)	<0.001
						log(Pr(early DM/Pr(no DM)) =-0.79 - 0.05(age) - 0.20(sex) + 2.24(HbA1c)
				late T2D (>= 8 years)		1.13 (1.01, 1.24)	3.08 (2.74, 3.46)	<0.001
						log(Pr(late DM/Pr(no DM)) =0.69 - 0.04(age) - 0.01 (sex) + 1.13(HbA1c)
				Early T2D (<8 years)	ARIC Blacks	2.13 (1.59, 2.67)	8.39 (4.88, 14.41)	<0.001
						log(Pr(early DM/Pr(no DM)) =-3.10 - 0.02(age) + 0.16(sex) + 2.13(HbA1c)
				late T2D (>= 8 years)		0.86 (0.67, 1.05)	2.36 (1.96, 2.85)	<0.001
						log(Pr(late DM/Pr(no DM)) =0.98 - 0.04(age) + 0.04(sex) + 0.86(HbA1c)
	HbA1c + clinic visit	age, sex, FH, BMI, SBP	Binary (>=5.7 % vs. <5.7)	Early T2D (<8 years)	FHS	1.12 (0.45, 1.79)	3.06 (1.57, 5.99)	0.001
						log(Pr(early DM)/Pr(no DM)) =-14.02+0.04(age)+0.33(sex)+0.93(FH) +0.16(BMI)+0.015(SBP)+1.12(HbA1c)
				late T2D (>= 8 years)		1.12 (0.68, 1.57)	3.06 (1.97, 4.81)	<0.001
						log(Pr(late DM)/Pr(no DM)) =-8.33-0.009(age)+0.20(sex)+0.97(FH) +0.14(BMI)+0.009(SBP)+1.12(HbA1c)
				Early T2D (<8 years)	ARIC Whites	2.02 (1.79, 2.24)	7.52 (5.99, 9.44)	<0.001
						log(Pr(early DM)/Pr(no DM)) =-6.00 - 0.04(age) - 0.26(sex) + 0.64(FH) + 0.15(BMI) + 0.004(SBP) + 2.02(HbA1c)
				late T2D (>= 8 years)		1.00 (0.89, 1.12)	2.73 (2.42, 3.07)	<0.001
						log(Pr(late DM)/Pr(no DM)) =-2.49 - 0.04(age) + 0.03(sex) + 0.50(FH) + 0.08(BMI) + 0.007(SBP) + 1.00(HbA1c)
				Early T2D (<8 years)	ARIC Blacks	2.00 (1.45, 2.54)	7.38 (4.28, 12.74)	<0.001
						log(Pr(early DM)/Pr(no DM)) =-6.39 - 0.02(age) - 0.07(sex) + 0.54(FH) + 0.06(BMI) + 0.01(SBP) + 2.00(HbA1c)
				late T2D (>= 8 years)		0.78 (0.59, 0.97)	2.18 (1.81, 2.63)	<0.001
						log(Pr(late DM)/Pr(no DM)) =-0.52 - 0.04(age) - 0.11(sex) + 0.21(FH) + 0.05(BMI) + 0.00(SBP) + 0.78(HbA1c)
	HbA1c: hemoglobin A1c (%-units); T2D: type 2 diabetes; FG: fasting glucose (mg/dL); sex (female=1; male=0); TG: triglycerides (mg/dL); HDL: high density lipoprotein (mg/dL); FH: family history of type 2 diabetes (yes=1; no=0); BMI: body mass index (kgm-2); SBP: systolic blood pressure (mmHg); 95% CI: 95% confidence interval; FHS: Framingham Heart Study; ARIC: Atherosclerosis risk in Communities; …

## Sheet: Suppl Table 6 include HbA1c
	Table S7: Association of HbA1c with incident T2D including A1C in the case definition adjusted for other clinical predictors by cohort and race
	Model	Covariates	Cohort /race	AUC without HbA1c (95%CI)	AUC with HbA1c (95%CI)	Difference in AUC (95%CI)	P	Beta Cofficients for HbA1c (95% CI) and Model Equations	OR	P
	HbA1c-only	age, sex	FHS	0.56	0.69	0.01315	<0.001	1.32(1.01-1.62)	3.73	<0.001
				(0.53, 0.59)	(0.66, 0.73)	(0.0911, 0.172)		log(OR)=-8.48(Intercept)-0.01(age)-0.37(sex)+1.32(HbA1c)	(2.76-5.04)
			ARIC Whites	0.549	0.663	0.114	<.0001	1.78 (1.62-1.93)	5.91 (5.07-6.90)	<.001
				(0.535, 0.562)	(0.650, 0.676)	(0.114, 0.114)		log(OR)=-7.68(Intercept)-0.05(age)-0.10(sex)+1.78(HbA1c)
			ARIC Blacks	0.556	0.669	0.113	<.0001	1.49 (1.25-1.74)	4.46	<.001
				(0.531, 0.580)	(0.645, 0.692)	(0.112, 0.114)		log(OR)=-6.20(Intercept)-0.05(age)+0.06(sex)+1.49(HbA1c)	(3.49-5.69)
	HbA1c + fasting labs	age, sex, FG, TG, HDL	FHS	0.82	0.83	0.0143	0.015	0.84(0.51-1.16)	2.31	<.001
				(0.79, 0.84)	(0.81, 0.86)	(0.0028, 0.0258)		log(OR)=-15.3(Intercept)-0.03(age)+ 0.47(sex)+ 0.84(HbA1c)-0.05(HDL)+ 0(TG)+0.12(FG)	(1.67-3.19)
			ARIC Whites	0.708	0.726	0.018	<.0001	1.22 (1.06-1.38)	3.39	<.001
				(0.696, 0.721)	(0.714, 0.739)	(0.018, 0.018)		log(OR)=-10.4(Intercept)-0.06(age)+ 0.31(sex)+ 1.22(HbA1c)-0.01(HDL)+ 0.003(TG)+0.059(FG)	(2.88-3.99)
			ARIC Blacks	0.681	0.715	0.034	<.0001	1.13 (0.87-1.38)	3.09	<.001
				(0.657, 0.704)	(0.692, 0.737)	(0.033, 0.035)		log(OR)=-9.26(Intercept)-0.05(age)+ 0.15(sex)+ 1.13(HbA1c)-0.003(HDL)+ 0.003(TG)+0.048(FG)	(2.40-3.97)
	HbA1c + clinic visit	age, sex, FH, BMI, SBP	FHS	0.72	0.76	0.0387	0.0006	1.09(0.78-1.40)	2.99	<.001
				(0.69-0.75)	(0.73-0.79)	(0.0165,0.0608)		log(OR)= -12.81(Intercept) -0.01(age)-0.27(sex)+1.09(HbA1c)+0.73(FH)+ 0.02(SBP)+0.12(BMI)	(2.19-4.07)
			ARIC Whites	0.664	0.708	0.044	<.0001	1.60 (1.44-1.76)	4.96	<.001
				(0.652, 0.677)	(0.696, 0.721)	(0.043, 0.044)		log(OR)= -10.04(Intercept) -0.05(age)-0.07(sex)+1.60(HbA1c)+0.47(FH)+ 0.01(SBP)+0.09(BMI)	(4.24-5.81)
			ARIC Blacks	0.618	0.687	0.069	<.0001	1.39 (1.14-1.63)	4.01	<.001
				(0.595, 0.642)	(0.665, 0.710)	(0.068, 0.070)		log(OR)= -7.15(Intercept) -0.05(age)-0.09(sex)+1.39(HbA1c)+0.22(FH)+ 0(SBP)+0.05(BMI)	(3.13-5.12)
	HbA1c + fasting labs + clinic visit	age, sex, BMI, SBP, FH, FG, TG, HDL	FHS	0.83	0.84	0.0129	0.014	0.75 (0.42-1.09)	2.13	<.001
				(0.80, 0.85)	(0.81, 0.86)	(0.00265, 0.0232)		log(OR)=-17.34(Intercept)-0.03(age)+ 0.41(sex)+ 0.75(HbA1c)+ 0.76(FH)+ 0.01(SBP)+0.06(BMI) -0.05(HDL)+ 0(TG)+0.11(FG)	(1.53-2.96)
			ARIC Whites	0.728	0.742	0.015	<.0001	1.18 (1.02-1.35)	3.26	<.001
				(0.716, 0.740)	(0.730, 0.754)	(0.014, 0.015)		log(OR)=-11.77(Intercept)-0.06(age)+ 0.25(sex)+ 1.18(HbA1c)+ 0.42(FH)+ 0.005(SBP)+0.06(BMI)-0.008(HDL)+ 0.003(TG)+0.05(FG)	(2.77-3.85)
			ARIC Blacks	0.694	0.722	0.028	<.0001	1.08 (0.83-1.33)	2.94	<.001
				(0.671, 0.717)	(0.700, 0.744)	(0.027, 0.029)		log(OR)=-9.91(Intercept)-0.05(age)+ 0.009(sex)+ 1.08(HbA1c)+ 0.19(FH)- 0.001(SBP)+0.04(BMI)+0(HDL)+ 0.003(TG)+0.05(FG)	(2.28-3.79)
	HbA1c: hemoglobin A1c (%-units); T2D: type 2 diabetes; FG: fasting glucose (mg/dL); sex (female=1; male=0); TG: triglycerides (mg/dL); HDL: high density lipoprotein (mg/dL); FH: family history of type 2 diabetes (yes=1; no=0); BMI: body mass index (kgm-2); SBP: systolic blood pressure (mmHg); 95% CI: 95% confidence interval; FHS: Framingham Heart Study; ARIC: Atherosclerosis risk in Communities; …

## Sheet: Suppl Table 7 race interaction
	Table S8: Test for interaction by race (ARIC Blacks vs. Whites) for the association of HbA1c with incident T2D over two decades
	Model	Covariates	Interaction term	Beta coefficients (95% CI) for interaction	P
	HbA1c-only	age, sex, race, HbA1c	Race(Blacks vs. Whites)*HbA1c	-0.36 (-0.64, -0.08)	0.012
	HbA1c + fasting labs	age, sex, FG, TG, HDL, race, HbA1c	Race(Blacks vs. Whites)*HbA1c	-0.24 (-0.53, 0.04)	0.097
	HbA1c + clinic visit	age, sex, FH, BMI, SBP, race, HbA1c	Race(Blacks vs. Whites)*HbA1c	-0.32 (-0.61, -0.04)	0.026
	HbA1c + fasting labs + clinic visit	age, sex, BMI, SBP, FH, FG, TG, HDL, race, HbA1c	Race(Blacks vs. Whites)*HbA1c	-0.24 (-0.53, 0.05)	0.107
	HbA1c: hemoglobin A1c (%-units); T2D: type 2 diabetes; FG: fasting glucose (mg/dL); sex (female=1; male=0); TG: triglycerides (mg/dL); HDL: high density lipoprotein (mg/dL); FH: family history of type 2 diabetes (yes=1; no=0); BMI: body mass index (kgm-2); SBP: systolic blood pressure (mmHg); 95% CI: 95% confidence interval; FHS: Framingham Heart Study; ARIC: Atherosclerosis risk in Communities; …

## Sheet: Suppl Table 8 AUC HbA1c base
	Table S9: Improvement in predictive performance for incident T2D by adding adding other covariates to HbA1c, by cohort and race
	Model	HbA1c-only (Base) model	Covariates	Cohort/Race	Base	Base + covariates	Difference in AUC (95%CI)	P
					AUC (95% CI)
	HbA1c-only	HbA1c	age, sex	FHS	0.6684	0.6791	0.0107	0.053
					(0.63-0.70)	(0.64, 0.71)	(-0.00016, 0.0215)
				ARIC Whites	0.643	0.661	0.018	<.0001
					(0.630, 0.656)	(0.648, 0.674)	(0.018, 0.018)
				ARIC Blacks	0.642	0.658	0.015	0.013
					(0.618, 0.667)	(0.634, 0.682)	(0.015, 0.016)
	HbA1c + fasting labs	HbA1c, age, sex	FG, TG, HDL	FHS	0.6791	0.8525	0.1734	<.0001
					(0.64-0.71)	(0.83-0.88)	(0.14, 0.21)
				ARIC Whites	0.661	0.726	0.065	<.0001
					(0.648, 0.674)	(0.713, 0.738)	(0.064, 0.066)
				ARIC Blacks	0.658	0.708	0..051	<.0001
					(0.634, 0.682)	(0.686, 0.731)	(0.050, 0.051)
	HbA1c + clinic visit	HbA1c, age, sex	FH, BMI, SBP	FHS	0.6791	0.771	0.0919	<.0001
					(0.64-0.71)	(0.74-0.80)	(0.06-0.12)
				ARIC Whites	0.661	0.707	0.046	<.0001
					(0.648, 0.674)	(0.695, 0.720)	(0.046, 0.047)
				ARIC Blacks	0.658	0.681	0.023	0.0001
					(0.634, 0.682)	(0.658, 0.704)	(0.022, 0.024)
	HbA1c + fasting labs + clinic visit	HbA1c, age, sex	BMI, SBP, FH, TG, HDL, FG	FHS	0.6791	0.8626	0.1835	<.0001
					(0.64-0.71)	(0.84-0.89)	(0.15-0.22)
				ARIC Whites	0.661	0.742	0.081	<.0001
					(0.648, 0.674)	(0.730, 0.754)	(0.080, 0.083)
				ARIC Blacks	0.658	0.718	0.06	<.0001
					(0.634, 0.682)	(0.695, 0.740)	(0.058, 0.061)
	HbA1c: hemoglobin A1c (%-units); T2D: type 2 diabetes; FG: fasting glucose (mg/dL); sex (female=1; male=0); TG: triglycerides (mg/dL); HDL: high density lipoprotein (mg/dL); FH: family history of type 2 diabetes (yes=1; no=0); BMI: body mass index (kgm-2); SBP: systolic blood pressure (mmHg); 95% CI: 95% confidence interval; FHS: Framingham Heart Study; ARIC: Atherosclerosis risk in Communities; …

## Sheet: Suppl Table 9 IFG
	Table S10: Association of HbA1c with incident T2D adjusted for other clinical predictors by race and cohort stratified by FG< 100 mg/dL (no IFG) and FG>=100 mg/dl (IFG)
	Model	Covariates	Cohort/ race	Beta Cofficients for HbA1c (95% CI) and Model Equations	OR	P
	FG <100 mg/dL
	HbA1c-only	age, sex	FHS	0.78 (0.29, 1.26)	2.18 (1.34, 3.53)	0.001
				log(OR)= -5.27-0.03(age)-0.39(sex)+0.78(HbA1c)
			ARIC Whites	1.12 (0.85, 1.40)	3.08 (2.34, 4.06)	<0.001
				ln(OR) = -5.48 -0.04(age)-0.02(sex)+1.12(HbA1c)
			ARIC Blacks	0.78 (0.33, 1.23)	2.18 (1.39, 3.41)	0.001
				ln(OR) = -3.52 -0.04(age)+0.22(sex)+0.78(HbA1c)
	HbA1c + fasting labs	age, sex, FG, TG, HDL	FHS	0.60 (0.09, 1.11)	1.82 (1.09, 3.04)	0.017
				log(OR)= -11.73-0.03(age)+0.5(sex)+0.61(HbA1c)-0.06(HDL)+0(TG)+0.1(FG)
			ARIC Whites	0.99 (0.71, 1.27)	2.69 (2.04, 3.56)	<0.001
				ln(OR) = -7.05 -0.04(age)+0.19(sex)+0.02(FG)+0.003(TG)-0.009(HDL)+0.99(HbA1c)
			ARIC Blacks	0.71 (0.25, 1.16)	2.06 (1.32, 3.22)	0.002
				ln(OR) = -3.74-0.04(age)+0.36(sex)+0.01(FG)+0.002(TG)-0.012(HDL)+0.71(HbA1c)
	HbA1c + clinic visit	age, sex, FH, BMI, SBP	FHS	0.65 (0.14, 1.16)	1.92 (1.15, 3.19)	0.012
				log(OR)= -9.18-0.04(age)-0.17(sex)+0.65(HbA1c)+0.2(FH)+0.02(SBP)+0.09(BMI)
			ARIC Whites	1.06 (0.78, 1.34)	2.87 (2.17, 3.80)	<0.001
				ln(OR) = -8.09 -0.04(age)+0.08(sex)+0.49(FH)+0.08(BMI)+0.01(SBP)+1.06(HbA1c)
			ARIC Blacks	0.68 (0.23, 1.14)	1.98 (1.25, 3.12)	0.003
				ln(OR) = -5.18-0.03(age)-0.03(sex)+0.29(FH)+0.07(BMI)+0(SBP)+0.68(HbA1c)
	HbA1c + fasting labs + clinic visit	age, sex, BMI, SBP, FH, FG, TG, HDL	FHS	0.55 (0.03, 1.07)	1.73 (1.03, 2.92)	0.038
				log(OR)= -13.32-0.04(age)+0.56(sex)+0.55(HbA1c)+0.18(FH)+0.02(SBP)+0.04(BMI)-0.06(HDL)+0(TG)
			ARIC Whites	0.97 (0.69, 1.26)	2.65 (2.00, 3.51)	<0.001
				ln(OR) = -8.82-0.04(age)+0.19(sex)+ 0.07(BMI)+0.01(SBP)+0.46(FH)+0.02(FG)+0.003(TG)-0.005(HDL)+0.97(HbA1c)
			ARIC Blacks	0.64 (0.19, 1.10)	1.90 (1.20, 3.01)	0.006
				ln(OR) = -4.86-0.03(age)+0.08(sex)+0.07(BMI)+0(SBP)+0.28(FH)+0(FG)+0.002(TG)-0.008(HDL)+0.64(HbA1c)
			Meta-analysis	0.79 (0.52, 1.06)	2.20 (1.68, 2.88)	<0.001
				I-squared 26%; heterogeneity P = 0.26
	FG >= 100 mg/dL
	HbA1c-only	age, sex	FHS	1.14(0.75, 1.54)	3.13 (2.1, 4.65)	<0.001
				ln(OR) = -6.13-0.02(age)+0.04(sex)+1.14(HbA1c)
			ARIC Whites	1.66 (1.47, 1.86)	5.26 (4.33, 6.39)	<0.001
				ln(OR) = -6.17 -0.06(age)+0.05(sex)+1.66(HbA1c)
			ARIC Blacks	1.34 (1.04, 1.64)	3.82 (2.83, 5.14)	<0.001
				ln(OR) = -5.17-0.05(age)+0.06(sex)+1.34(HbA1c)
	HbA1c + fasting labs	age, sex, FG, TG, HDL	FHS	0.99 (0.57, 1.40)	2.68 (1.77, 4.07)	<0.001
				ln(OR) = -17.16-0.03(age)+0.43(sex)+0.13(FG)+0(TG)-0.04(HDL)+0.99(HbA1c)
			ARIC Whites	1.26 (1.06, 1.47)	3.54 (2.89, 4.34)	<0.001
				ln(OR) = -11.75-0.07(age)+0.37(sex)+0.07(FG)+0.003(TG)-0.013(HDL)+1.26(HbA1c)
			ARIC Blacks	1.16 (0.85, 1.46)	3.17 (2.34, 4.31)	<0.001
				ln(OR) = -10.77-0.05(age)+0.09(sex)+0.06(FG)+0.003(TG)+0(HDL)+1.16(HbA1c)
	HbA1c + clinic visit	age, sex, FH, BMI, SBP	FHS	0.96 (0.56, 1.36)	2.61 (1.76, 3.89)	<0.001
				ln(OR) = -10.56-0.01(age)-0.08(sex)+1.4(FH)+0.11(BMI)+0.01(SBP)+0.96(HbA1c)
			ARIC Whites	1.54 (1.34, 1.74)	4.65 (3.81, 5.67)	<0.001
				ln(OR) = -8.53-0.06(age)+0.01(sex)+0.46(FH)+0.07(BMI)+0.01(SBP)+1.54(HbA1c)
			ARIC Blacks	1.28 (0.98, 1.58)	3.58 (2.65, 4.84)	<0.001
				ln(OR) = -5.94-0.05(age)-0.04(sex)+0.19(FH)+0.03(BMI)+0(SBP)+1.28(HbA1c)
	HbA1c + fasting labs + clinic visit	age, sex, BMI, SBP, FH, FG, TG, HDL	FHS	0.90 (0.48, 1.32)	2.46 (1.61, 3.75)	<0.001
				ln(OR) = -19.36-0.03(age)+0.28(sex)+0.08(BMI)+0.01(SBP)+1.36(FH)+0.12(FG)+0(TG)-0.04(HDL)+ 0.9(HbA1c)
			ARIC Whites	1.22 (1.01, 1.43)	3.39 (2.76, 4.16)	<0.001
				ln(OR) = -13.0-0.07(age)+0.28(sex)+0.05(BMI)+0(SBP)+0.42(FH)+0.07(FG)+0.003(TG)-0.01(HDL)+1.22(HbA1c)
			ARIC Blacks	1.11 (0.80, 1.42)	3.03 (2.23, 4.12)	<0.001
				ln(OR) = -11.4-0.05(age) -0.02(sex)+0.03(BMI)+0(SBP)+0.17(FH)+0.06(FG)+0.003TG)+0.001(HDL)+ 1.11(HbA1c)
			Meta-analysis	1.14 (0.98, 1.30)	3.14 (2.67, 3.69)	<0.001
				I-squared = 0%; heterogeneity P = 0.40
	Meta-analysis using random effects; IFG: Impaired fasting glucose; HbA1c: hemoglobin A1c (%-units); T2D: type 2 diabetes; FG: fasting glucose (mg/dL); sex (female=1; male=0); TG: triglycerides (mg/dL); HDL: high density lipoprotein (mg/dL); FH: family history of type 2 diabetes (yes=1; no=0); BMI: body mass index (kgm-2); SBP: systolic blood pressure (mmHg); 95% CI: 95% confidence interval; FHS: …

## Sheet: Supp Table 10 IFG AUC
	Table S11: Improvement in predictive performance for incident T2D by adding HbA1c to other clinical predictors of T2D by cohort and race, and stratified by FG<100 mg/dL (no IFG) and FG>=100 mg/dL (IFG)
	Model	Covariates	Cohort/Race	AUC without HbA1c (95%CI)	AUC with HbA1c (95%CI)	Difference in AUC (95%CI)	P
	FG<100 mg/dL
	HbA1c-only	age, sex	FHS	0.57 (0.50, 0.63)	0.62 (0.55, 0.69)	0.052 (-0.006, 0.109)	0.08
			ARIC Whites	0.54 (0.52, 0.56)	0.60 (0.58, 0.63)	0.062 (0.062, 0.062)	<0.001
			ARIC Blacks	0.56 (0.52, 0.61)	0.61 (0.56, 0.65)	0.045 (0.043, 0.048)	0.025
	HbA1c + fasting labs	age, sex, TG, HDL, FG	FHS	0.79 (0.73, 0.84)	0.79 (0.74, 0.84)	0.005 (-0.009, 0.02)	0.462
			ARIC Whites	0.61 (0.59, 0.63)	0.64 (0.61, 0.66)	0.027 (0.026, 0.028)	0.002
			ARIC Blacks	0.59 (0.54, 0.63)	0.62 (0.57, 0.66)	0.029 (0.028, 0.029)	0.045
	HbA1c + clinic visit	age, sex, FH, BMI, SBP	FHS	0.70 (0.65, 0.76)	0.71 (0.66, 0.77)	0.014 (-0.011, 0.04)	0.263
			ARIC Whites	0.64 (0.61, 0.66)	0.66 (0.63, 0.68)	0.018 (0.018, 0.019)	0.013
			ARIC Blacks	0.63 (0.59, 0.68)	0.65 (0.61, 0.70)	0.016 (0.016, 0.017)	0.173
	HbA1c + fasting labs + clinic visit	age, sex, BMI, SBP, FH, FG, TG, HDL	FHS	0.79 (0.75, 0.85)	0.80 (0.75, 0.85)	0.005 (-0.006, 0.016)	0.37
			ARIC Whites	0.65 (0.63, 0.68)	0.67 (0.64, 0.69)	0.012 (0.012, 0.013)	0.048
			ARIC Blacks	0.64 (0.60, 0.69)	0.66 (0.61, 0.70)	0.014 (0.014, 0.014)	0.185
	FG>=100 mg/dL
	HbA1c-only	age, sex	FHS	0.52 (0.47, 0.57)	0.65 (0.60, 0.70)	0.129 (0.064, 0.194)	<0.001
			ARIC Whites	0.57 (0.55, 0.58)	0.66 (0.65, 0.68)	0.095 (0.095, 0.096)	<0.001
			ARIC Blacks	0.55 (0.52, 0.58)	0.64 (0.62, 0.67)	0.090 (0.089, 0.091)	<0.001
	HbA1c + fasting labs	age, sex, TG, HDL,FG	FHS	0.76 (0.73, 0.80)	0.79 (0.75, 0.82)	0.022 (0.002, 0.041)	0.01
			ARIC Whites	0.69 (0.67, 0.70)	0.71 (0.70, 0.73)	0.026 (0.026, 0.026)	<0.001
			ARIC Blacks	0.62 (0.59, 0.65)	0.67 (0.64, 0.69)	0.041 (0.040, 0.042)	<0.001
	HbA1c + clinic visit	age, sex, FH, BMI, SBP	FHS	0.73 (0.69, 0.77)	0.75 (0.71, 0.80)	0.022 (0.000, 0.044)	0.048
			ARIC Whites	0.65 (0.64, 0.67)	0.70 (0.68, 0.71)	0.044 (0.043, 0.044)	<0.001
			ARIC Blacks	0.60 (0.57, 0.63)	0.65 (0.62, 0.68)	0.052 (0.051, 0.053)	<0.001
	HbA1c + fasting labs + clinic visit	age, sex, BMI, SBP, FH, FG, TG, HDL	FHS	0.81 (0.78, 0.85)	0.82 (0.79-0.86)	0.012 (-0.001, 0.026)	0.022
			ARIC Whites	0.70 (0.68, 0.71)	0.72 (0.71, 0.74)	0.024 (0.024, 0.024)	<0.001
			ARIC Blacks	0.63 (0.60, 0.66)	0.66 (0.63, 0.69)	0.034 (0.034, 0.035)	<0.001
	IFG: Impaired fasting glucose; HbA1c: hemoglobin A1c (%-units); T2D: type 2 diabetes; FG: fasting glucose (mg/dL); sex (female=1; male=0); TG: triglycerides (mg/dL); HDL: high density lipoprotein (mg/dL); FH: family history of type 2 diabetes (yes=1; no=0); BMI: body mass index (kgm-2); SBP: systolic blood pressure (mmHg); 95% CI: 95% confidence interval; FHS: Framingham Heart Study; ARIC: Athero…

[truncated: 2 more sheets: Suppl Table 11 short long term, Suppl Tabe 12 pred risk class]
